# Supplementary material
Source: Springer Nature journal article supplement (https://www.springermedizin.de/resource/supplementary/12974_2011_363_MOESM3_ESM.pdf/9601526)

## Saline

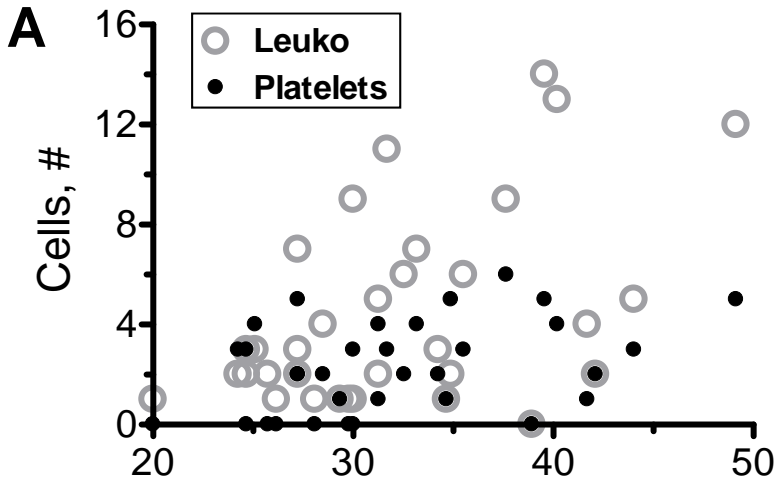

## DPTA-NO

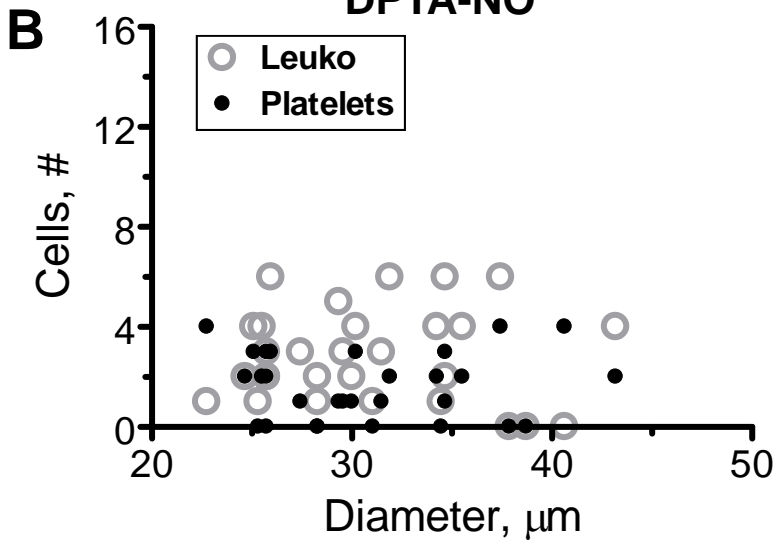

Supplement: MOESM3 [file 9601526]
